# Supplementary material
Source: PubMed Central journal article supplement (PMC3431635)

## Supplemental Figures

**Figure S1.** Protein sequence alignment between NorM-VC and hMATE1. Identical regions are shaded in yellow, similar regions in light blue. Secondary structures are marked with cartoons. Gaps are shown in dashed lines. Alignment was produced by ClustalW.

**Figure S2.** RMSD versus time between simulation snapshots and NorM x-ray structure (black), and hMATE1 homology model (red), after first aligning each simulation frame to the initial structures. The RMSD was taken for the C $\alpha$  atoms of the protein that were embedded in the simulated membrane, and it was calculated every 50 ps of simulation time.

**Figure S3.** Helical tilt angles are shown versus simulation time for each of the 12 helices in both NorM (black) and hMATE1 (red). The tilt angle was calculated by fitting a line to the C $\alpha$  coordinates of the membrane embedded region of each helix, and then finding the dot product of the resulting vector with the z-axis (the membrane normal direction).

**Figure S4.** Images of the hMATE1 homology model (a and c), and from the end of the 50 ns hMATE1 MD simulation (b and d). A side view (a and b) and a view from the extracellular side of the membrane (c and d) are shown. Coloring of the helices is from the N-terminus (blue) to the C-terminus (red). The channel profile was calculated using the program HOLE (n14). Coloring of the channel is: red (radius < 1.15 Å), green (1.15 Å < radius < 2.30 Å), and blue (radius > 2.30 Å).



Figure S2

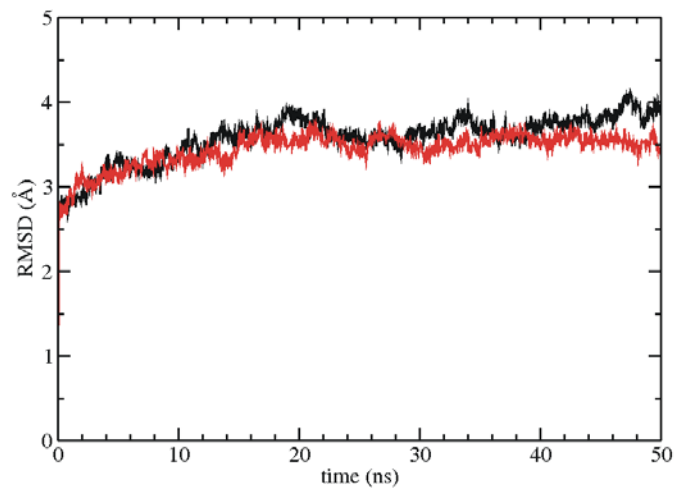

Figure S3

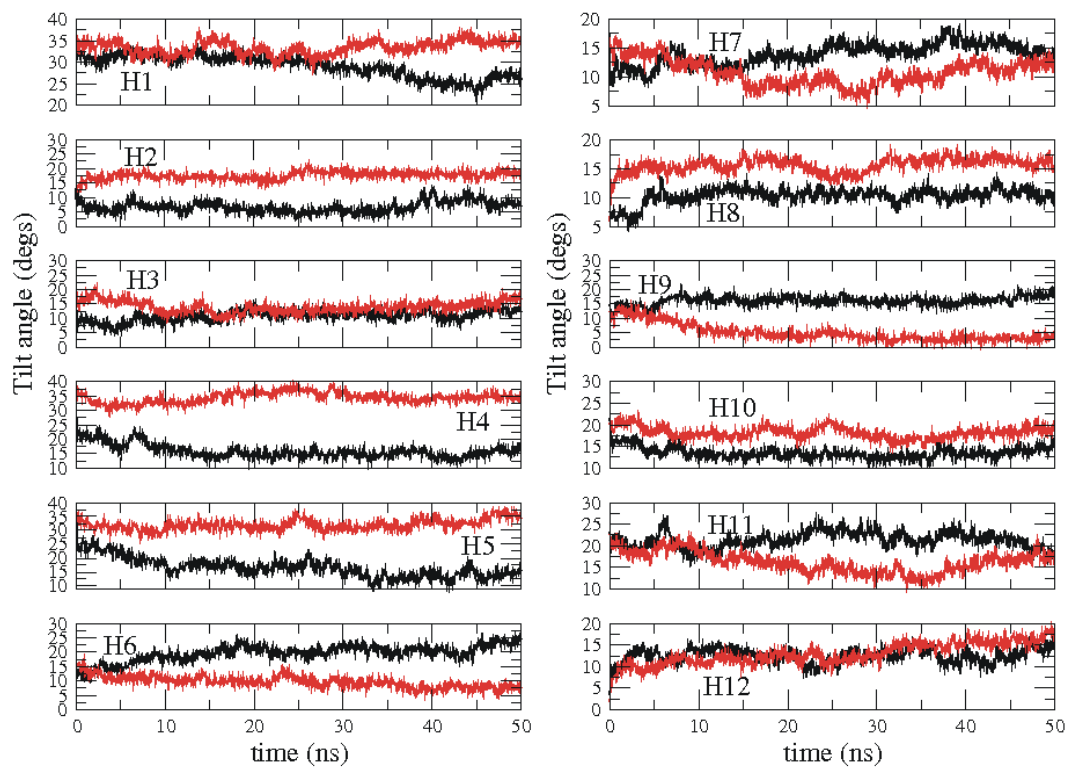

Figure S4

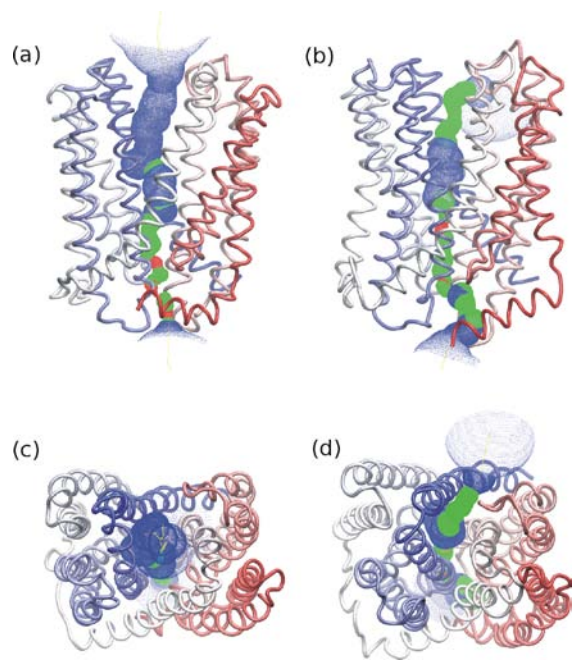

Supplement: supp_M112.386979_jbc.M112.386979-1.pdf [file supp_M112.386979_jbc.M112.386979-1.pdf]
